# Supplementary material for: Reconfigurable and resettable arithmetic logic units based on magnetic beads and DNA
Source: Royal Society of Chemistry journal article supplement (doi:10.1039/c5nr06733b), 2015-01-01
Supplement: c5nr06733b1.pdf [file c5nr06733b1.pdf]

1 mechanical stirring for 12 h. After being separated, the product was mixed with  
2 APTES (100 $\mu$ L) and ammonia (2 mL) under mechanical stirring for another 12 h.  
3 Then 50 mL of Au NPs solution (13 nm, synthesized with citrate reduction) was  
4 added into the dispersed solution<sup>34</sup>. The diameter of the Fe<sub>3</sub>O<sub>4</sub>@SiO<sub>2</sub>@Au was about  
5 200 nm evaluated by TEM measurements.

6 The molecular beacons functionalized Fe<sub>3</sub>O<sub>4</sub>@SiO<sub>2</sub>@Au was prepared by  
7 mixing Fe<sub>3</sub>O<sub>4</sub>@SiO<sub>2</sub>@Au suspension with thiol-molecular beacons (final  
8 concentration of oligonucleotides 10  $\mu$ M) in PBS buffer (0.3 M NaCl, 0.2 PBS, pH=7)  
9 under continuous shaking for 16 hours. To remove excess thiol-molecular beacons,  
10 these molecular beacons-functionalized Fe<sub>3</sub>O<sub>4</sub>@SiO<sub>2</sub>@Au nanoparticles were  
11 magnetic separated and washed three times using Tris-HCl buffer (20 mM Tris-HCl,  
12 200 mM KCl, 10 mM MgCl<sub>2</sub>, pH 8.0). The functionalized Fe<sub>3</sub>O<sub>4</sub>@SiO<sub>2</sub>@Au  
13 nanoparticles were stored in the buffer solution<sup>35</sup> and used as the initial platform of  
14 the half adder and half subtractor.

15

16

17

18

19

20

21

22

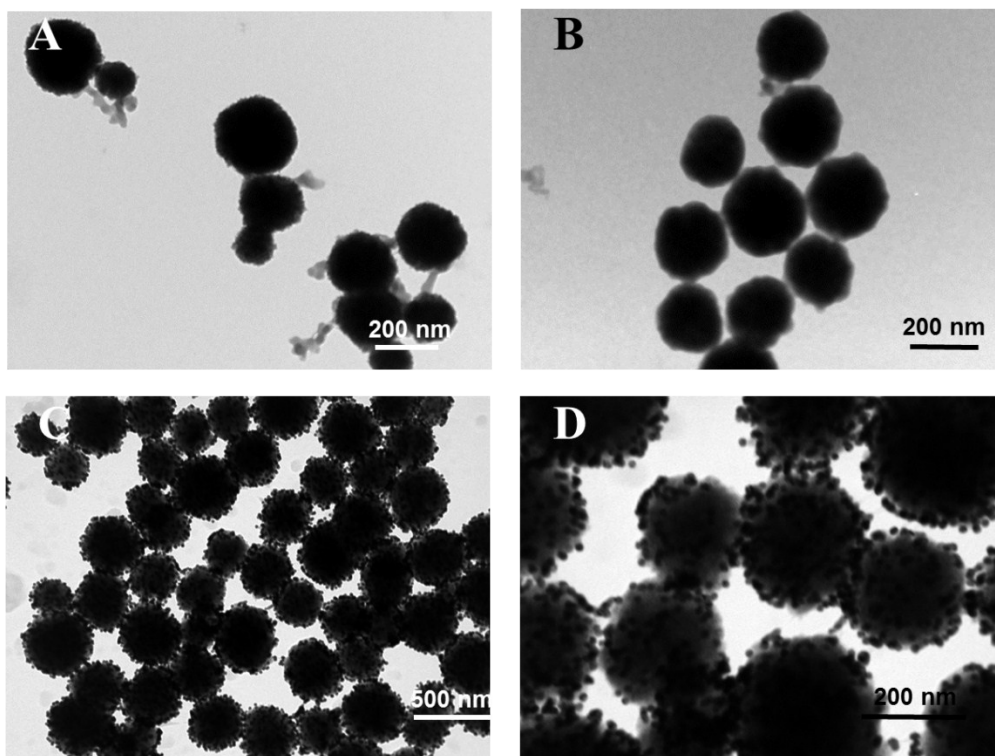

1  
 2 **Fig. S1.** Transmission electron micrograph (TEM) of (A)  $\text{Fe}_3\text{O}_4$  microspheres, (B)  
 3 magnetic  $\text{Fe}_3\text{O}_4@\text{SiO}_2$  core/shell composites, (C) and (D) magnetic  
 4  $\text{Fe}_3\text{O}_4@\text{SiO}_2@\text{Au}$  composites.

5  
 6 As exhibited by transmission electron microscopy (TEM), Fig. S1A shows the  
 7 magnetic nanoparticles have an average diameter of about 200 nm. Through the  
 8 hydrolysis and condensation of TEOS in the ethanol–ammonia mixture, the silica  
 9 layer was gradually coated onto the surface of  $\text{Fe}_3\text{O}_4$  nanosphere. The core–shell  
 10 structure of  $\text{Fe}_3\text{O}_4@\text{SiO}_2$  nanosphere was clearly exhibited in Fig. S1B. Then the  
 11 magnetic  $\text{Fe}_3\text{O}_4@\text{SiO}_2@\text{Au}$  nanoparticles were prepared based on Au–N binding  
 12 between the amine modified on the surface of  $\text{Fe}_3\text{O}_4@\text{SiO}_2$  and gold nanoparticles  
 13 (Fig. S1C and Fig. S1D). The prepared  $\text{Fe}_3\text{O}_4@\text{SiO}_2@\text{Au}$  nanoparticles had long-time  
 14 stability and would not be separated under ultrasonic condition.

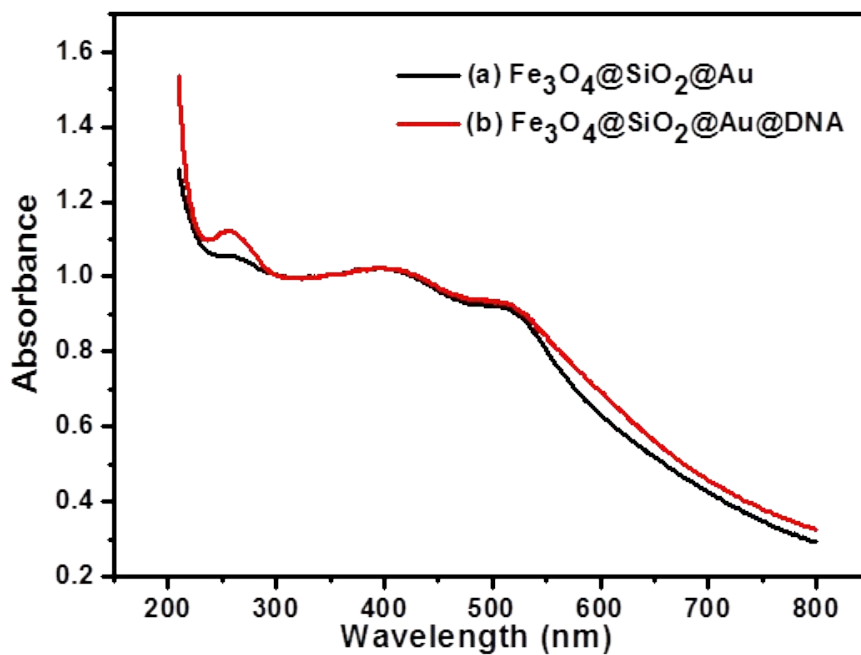

1

2 **Fig. S2.** The UV-Vis absorption spectra of (a) Fe<sub>3</sub>O<sub>4</sub>@SiO<sub>2</sub>@Au (black curve) and (b)  
3 Fe<sub>3</sub>O<sub>4</sub>@SiO<sub>2</sub>@Au@DNA (red curve).

4

5 To endow reconfigurable function, molecular beacons are modified on the  
6 Fe<sub>3</sub>O<sub>4</sub>@SiO<sub>2</sub>@Au surface. After removing the excess molecular beacon, the  
7 functionalized magnetic bead is characterized by measuring the UV absorbance  
8 spectra (Fig. S2). Except that the feature peaks of gold nanoparticle are monitored at  
9 530 nm from Fig. S2a and S2b, a new peak at 260 nm is found for functionalized  
10 magnetic bead in Fig. S2b, indicating the successful anchoring of molecular beacon  
11 on the surface of magnetic bead.

12

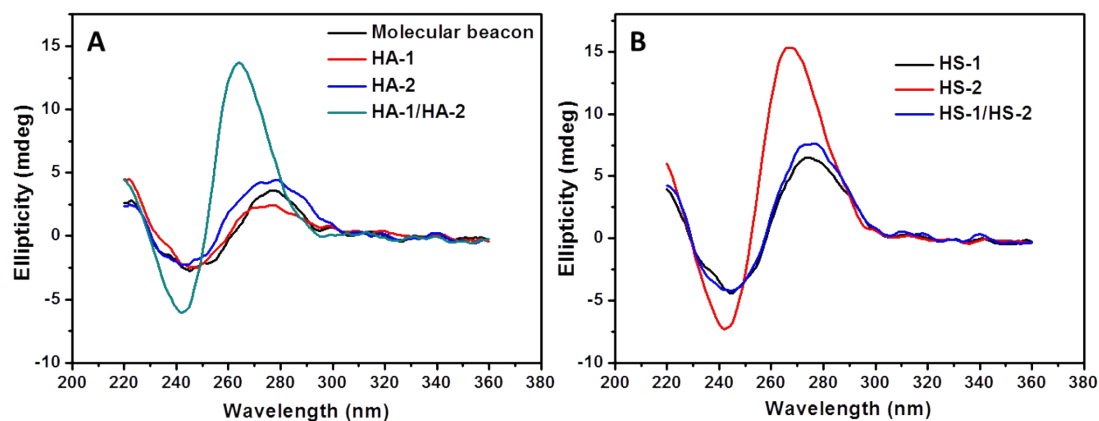

1

2 **Fig. S3.** CD spectra of products for characterizing the DNA structural conversion of  
 3 the half adder (A) and half subtractor (B), demonstrating G-quadruplex formation.

4 The concentration of each strand (MB, HA-1, HA-2, HS-1 and HS-2) was 1  $\mu$ M.

5

6 In the HA logic gate, G-quadruplex is formed owing to the hybridization of  
 7 HA-1 and HA-2. As shown in Fig. S3A, the CD spectra of the random  
 8 oligonucleotides, molecular beacon, HA-1 and HA-2 is of relatively low amplitude,  
 9 indicating that the DNA strands possess no obvious G-quadruplex structure. Once the  
 10 two inputs oligonucleotides hybridize together, distinct peaks appear at 242 nm for a  
 11 negative peak and 264 nm for a positive peak, respectively, indicating the formation  
 12 of a parallel G-quadruplex with the aid of  $K^+$  in the solution. In the HS logic gate, HS-  
 13 1 is a random single strand DNA and presents low amplitude. While HS-2 is a G-  
 14 riched oligonucleotide and can form a parallel G-quadruplex structure according to  
 15 obvious negative peak at 242 nm and positive peak at 267 nm in CD spectra. Once  
 16 adding HS-1 into HS-2 (curve c), the obvious peaks disappear, indicating that the  
 17 hybridization between HS-1 and HS-2 forms a more stable double-stranded structure  
 18 and influences the G-quadruplex configuration of HS-2.

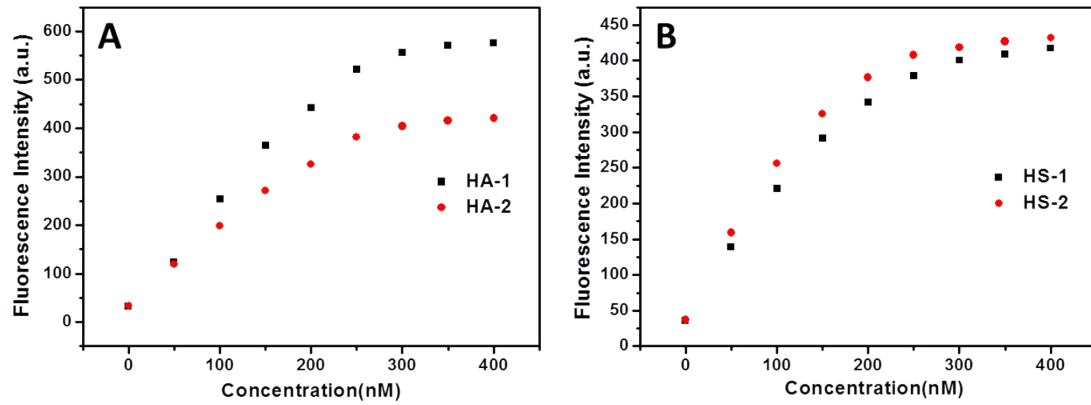

1

2 **Fig. S4** The FAM fluorescence response of magnetic bead/MB at 518 nm with  
 3 increasing the concentration of (A)HA-1, HA-2 and (B) HS-1, HS-2.

4

5 The fluorescent signal of FAM is gradually recovered and reaches a platform  
 6 with the increasing concentration of input DNA. Here, 250 nM was chosen as the  
 7 appropriate concentration for all the input DNA.

8

9

10

11

12

13

14

15

16

17

18
